# Supplementary material for: Critical involvement of ZEB2 in collagen fibrillogenesis: the molecular similarity between Mowat-Wilson syndrome and Ehlers-Danlos syndrome
Source: PubMed Central journal article supplement (PMC5396187; doi:10.1038/srep46565), 2017-04-19
Supplement: srep46565-s1.pdf [file srep46565-s1.pdf]

## Supplementary Information

### **Critical involvement of ZEB2 in collagen fibrillogenesis: the molecular similarity between Mowat-Wilson syndrome and Ehlers-Danlos syndrome**

Mika Teraishi <sup>1</sup>, Mikiro Takaishi <sup>1</sup>, Kimiko Nakajima <sup>1</sup>, Mitsunori Ikeda <sup>1</sup>, Yujiro Higashi <sup>2</sup>, Shinji Shimoda <sup>3</sup>, Yoshinobu Asada <sup>4</sup>, Atsushi Hijikata <sup>5</sup>, Osamu Ohara <sup>6</sup>, Yoko Hiraki <sup>7</sup>, Seiji Mizuno <sup>8</sup>, Toshiyuki Fukada <sup>9</sup>, Takahisa Furukawa <sup>10</sup>, Nobuaki Wakamatsu <sup>11</sup>, and Shigetoshi Sano <sup>1,\*</sup>

<sup>1</sup>Department of Dermatology, Kochi Medical School, Nankoku 783-8505, Japan; <sup>2</sup>Department of Perinatology, Institute for Developmental Research, Aichi Human Service Center, Kasugai 480-0392, Japan; <sup>3</sup>Department of Anatomy, Tsurumi University School of Dental Medicine, Yokohama 230-8501, Japan; <sup>4</sup>Department of Pediatric Dentistry, Tsurumi University School of Dental Medicine, Yokohama 230-8501, Japan; <sup>5</sup>Department of Bioscience, Nagahama Institute of Bio-Science and Technology, Nagahama 526-0829, Japan; <sup>6</sup>Laboratory for Integrative Genomics, RIKEN IMS, Yokohama 230-0045, Japan; <sup>7</sup>Hiroshima Municipal Center for Child Health and Development, Hiroshima 732-0052, Japan; <sup>8</sup>Department of Pediatrics, Central Hospital, Aichi Human Service Center, Kasugai 480-0392, Japan; <sup>9</sup>Department of Molecular and Cellular Physiology, Faculty of Pharmaceutical Science, Tokushima Bunri University, Tokushima 770-8514, Japan; <sup>10</sup>Laboratory for Molecular and Developmental Biology, Institute for Protein Research, Osaka University, Suita 565-0871, Japan; <sup>11</sup>Department of Genetics, Institute for Developmental Research, Aichi Human Service Center, Kasugai 480-0392, Japan

Supplementary Table 1. The profiles of MOWS patients in this study

| Pt # | Age/Sex | ref (pt#) | <i>ZEB2</i>                  |     | characteristic features of MOWS |     |    |            |   |      |         | EDS-like |    |    |
|------|---------|-----------|------------------------------|-----|---------------------------------|-----|----|------------|---|------|---------|----------|----|----|
|      |         |           | mut (fs, nsn)                | del | ID                              | CFA | MC | CHD        | S | HSCR | ACC/HCC | SH       | JH | AS |
| 1    | 5F      |           | –                            | NA  | +                               | +   | +  | +(ASD,VSD) | – | –    | HCC     | ++       | ++ | +  |
| 2    | 13F     | 19(S19)   |                              | *   | +                               | +   | +  | –          | + | +    | nd      | +        | +  | –  |
| 3    | 5M      |           | –                            | NA  | +                               | +   | +  | +(VSD)     | + | +    | HCC     | +        | –  | +  |
| 4    | 3M      | 3(S-131)  | c.862_863delG : p.G288Afs*10 |     | +                               | +   | +  | –          | + | +    | ACC     | ++       | –  | –  |
| 5    | 2M      |           | 1027C>T p.R343X              |     | +                               | +   | +  | –          | + | –    | HCC     | ++       | +  | –  |
| 6    | 16F     | 3(S-97)   | c.2083C>T p.R695X            |     | +                               | +   | –  | –          | + | –    | –       | +        | ++ | ++ |
| 7    | 13M     | 3(S-32)   | c.2083C>T p.R695X            |     | +                               | +   | –  | +(VSD)     | + | +    | nd      | +        | +  | +  |
| 8    | 8F      | 3(S-90)   | c.1417delA p.R473Gfs*14      |     | +                               | +   | +  | –          | – | +    | nd      | +        | +  | +  |
| 9    | 2F      |           | –                            | NA  | +                               | +   | +  | –          | – | +    | ACC     | +        | +  | ++ |
| 10   | 11M     | 3(S-98)   | c.2399C>G p.S800X            |     | +                               | +   | +  | +(VSD)     | + | –    | HCC     | –        | –  | +  |
| 11   | 12F     | 3(S-98)   | c.2282delC p.T761Kfs*26      |     | +                               | +   | –  | +(PDA)     | + | –    | ACC     | ++       | +  | ++ |
| 12   | 10M     | 3(K-02)   | 1027C>T p.R343X              |     | +                               | +   | –  | –          | + | –    | –       | +        | ++ | +  |

Pt, patient; mut, mutation; del, deletion; fs, frameshift; nsn, nonsense; ref, reference; NA, not analyzed; \*, 1.96 Mb deletion including exons 1 and 2; ID, intellectual disability; CFA, characteristic facial appearance; MC, microcephaly; CHD, congenital heart disease; ASD, atrial septal defect; VSD, ventricular septal defect; PDA, patent ductal arteriosus; S, seizure; HSCR, Hirschsprung disease; ACC, agenesis of the corpus callosum; HCC, hypoplasia of the corpus callosum; nd, not determined; SH, skin hyperextensibility; JH, joint hypermobility; AS, atrophic scar

**a**

Healthy control  
(12y.o. female)

MOWS patient  
(12y.o. female)

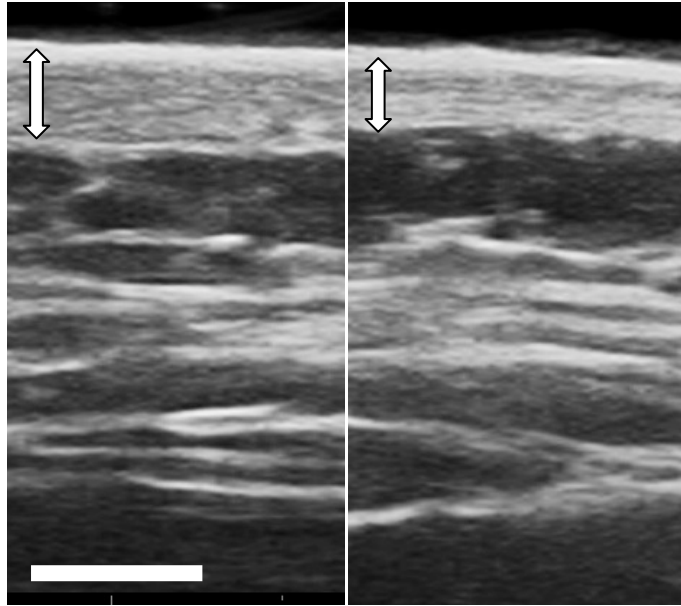

(Scale bar; 5mm)

**b**

(mm)

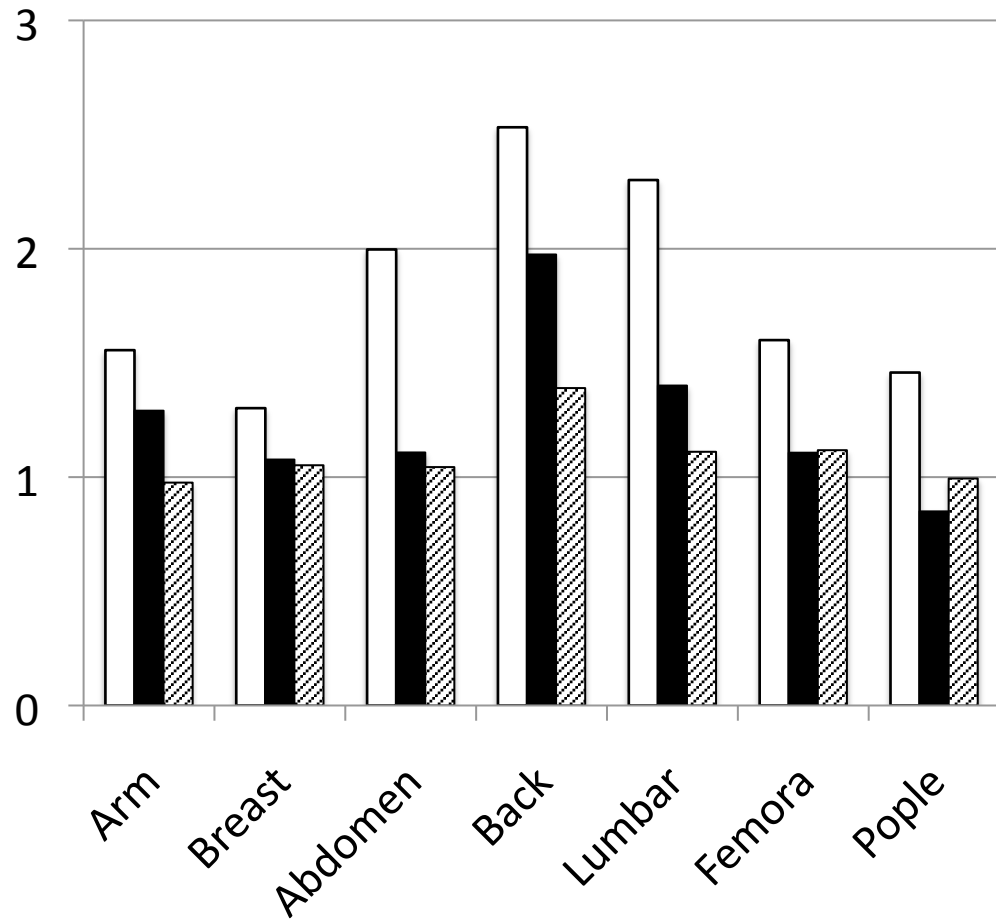

Supplementary Fig. 1

**a**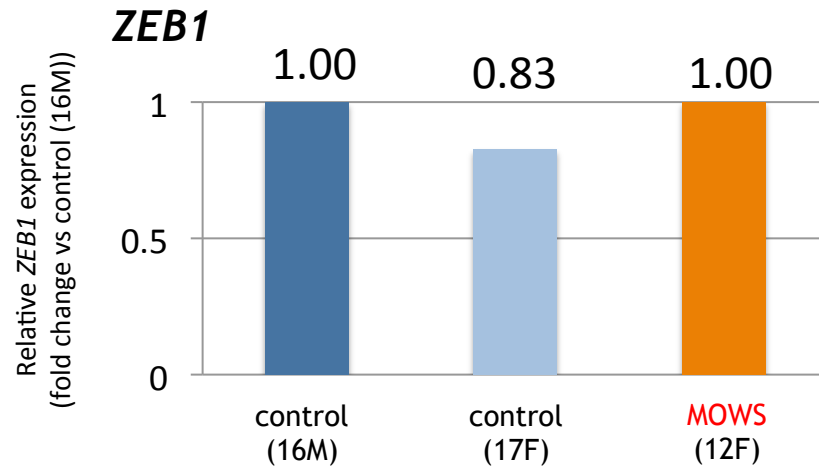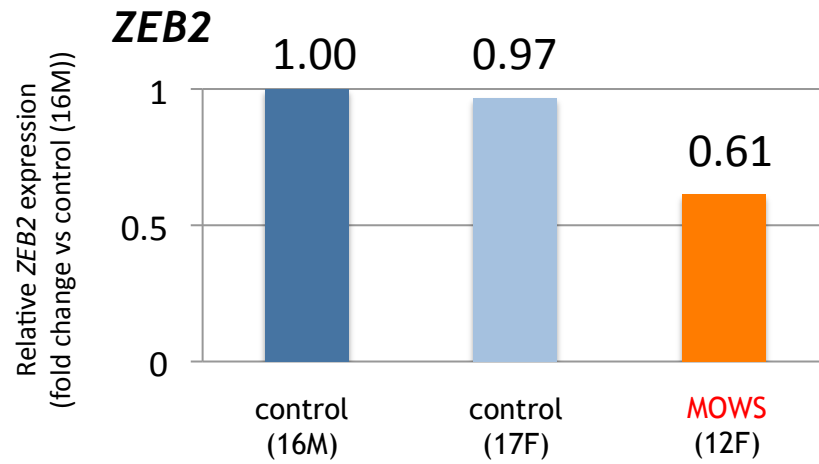**b**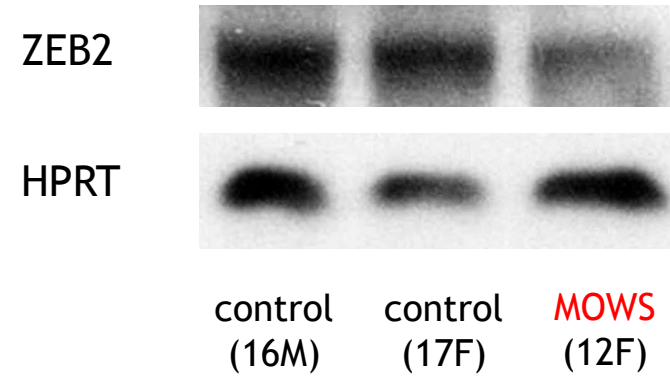**c**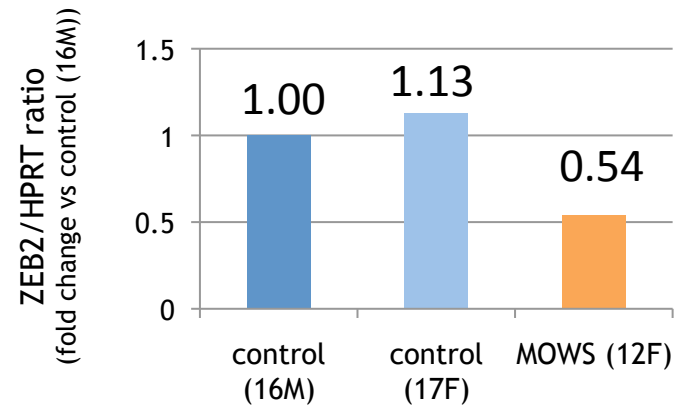

Supplementary Fig. 2

a

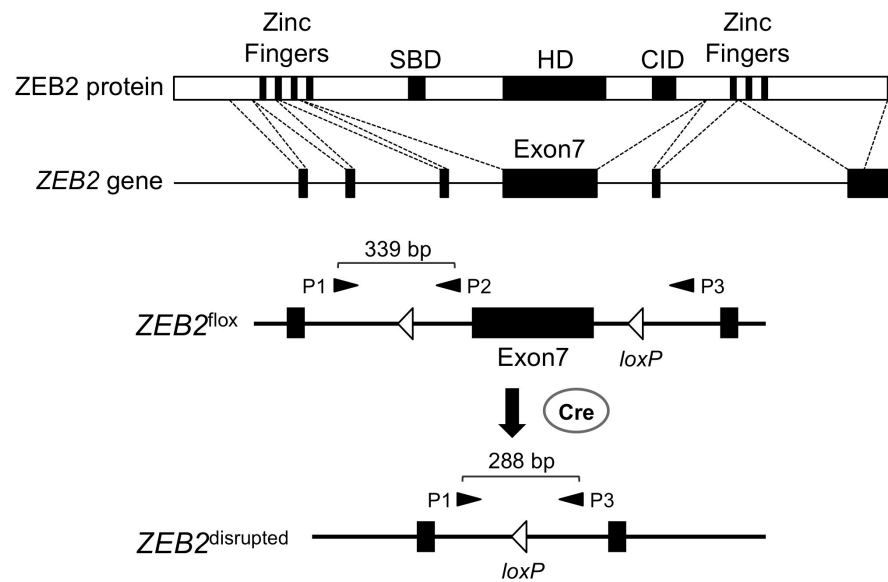

b

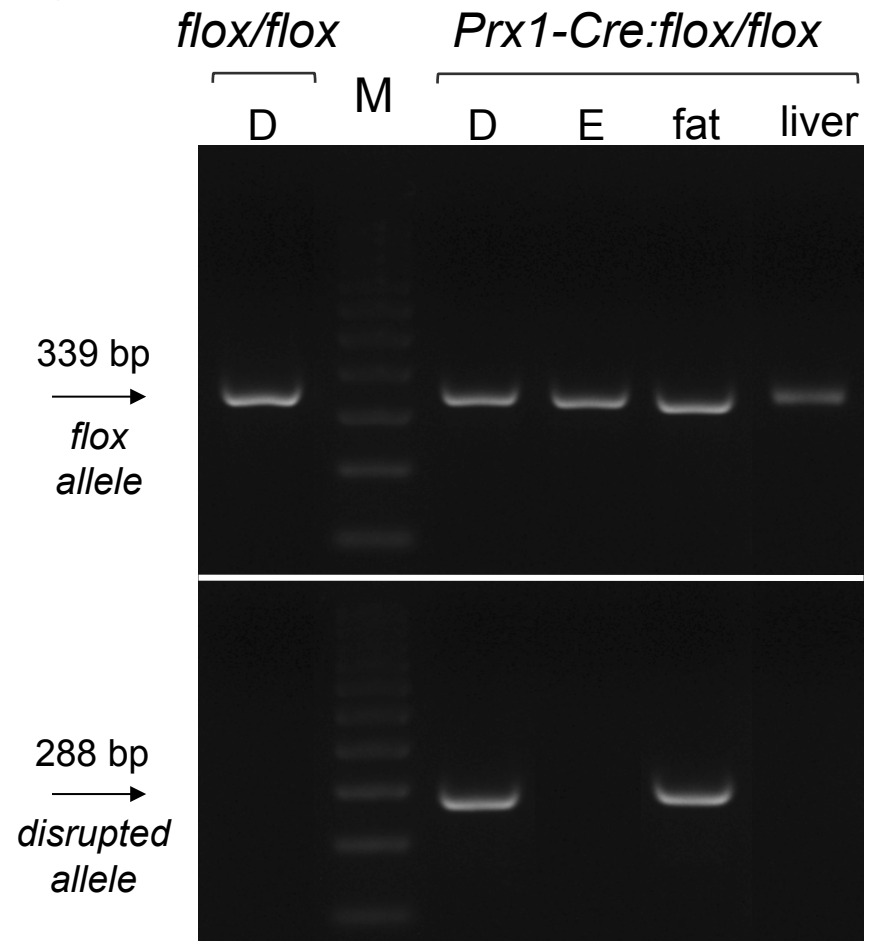

Supplementary Fig. 3

**a**

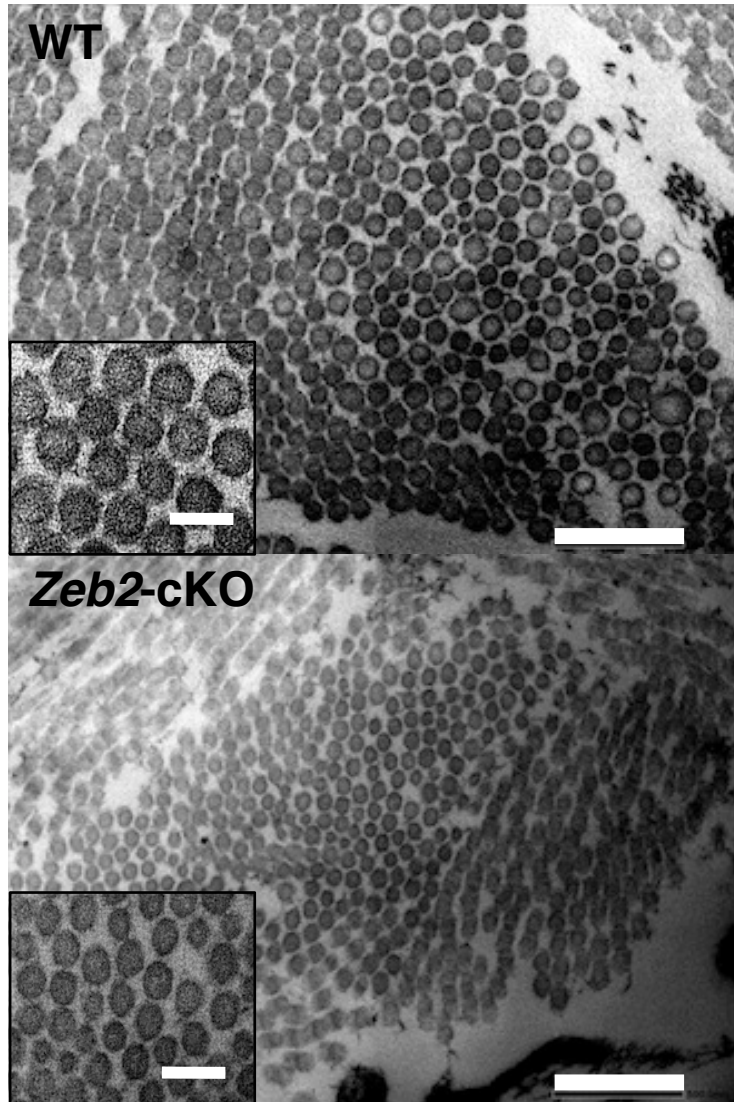

**b**

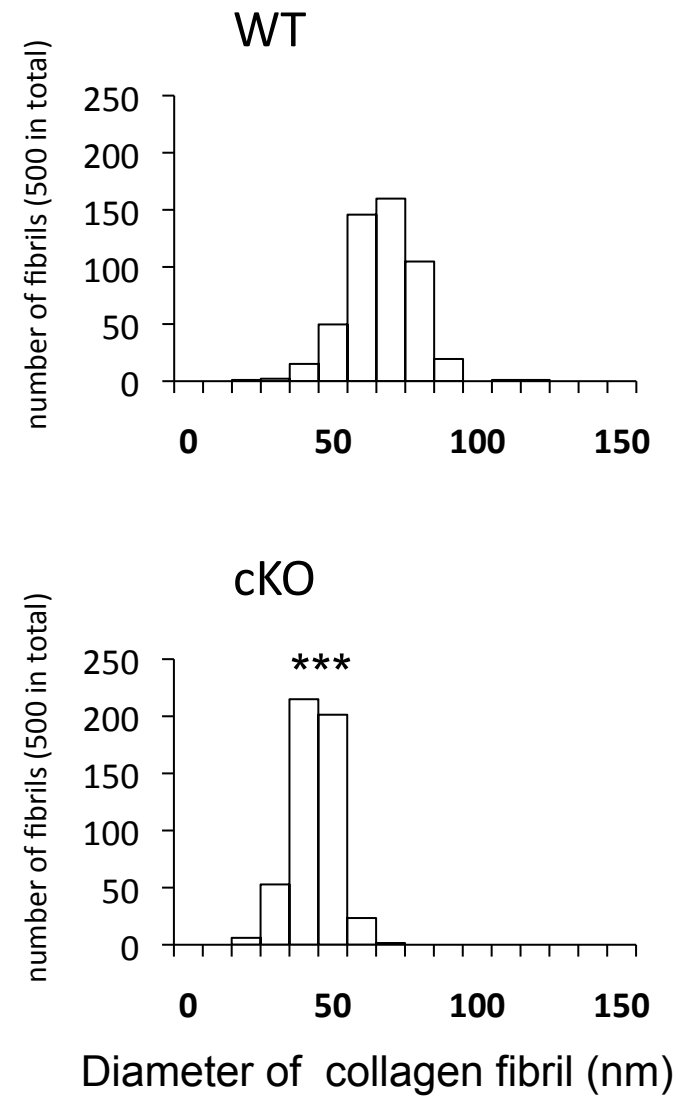

Supplementary Fig. 4

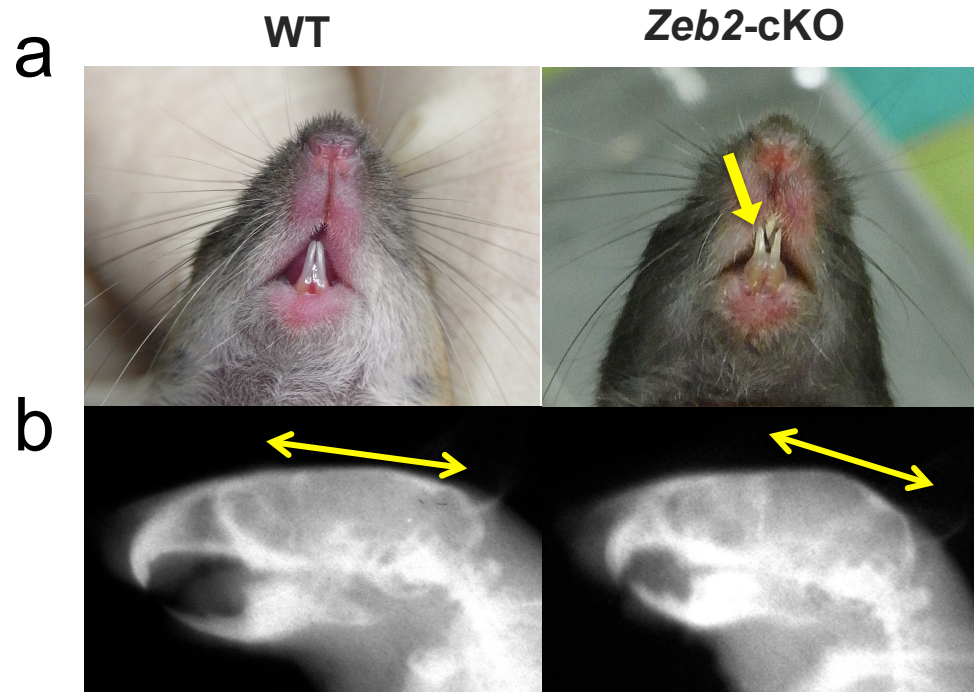

**C**

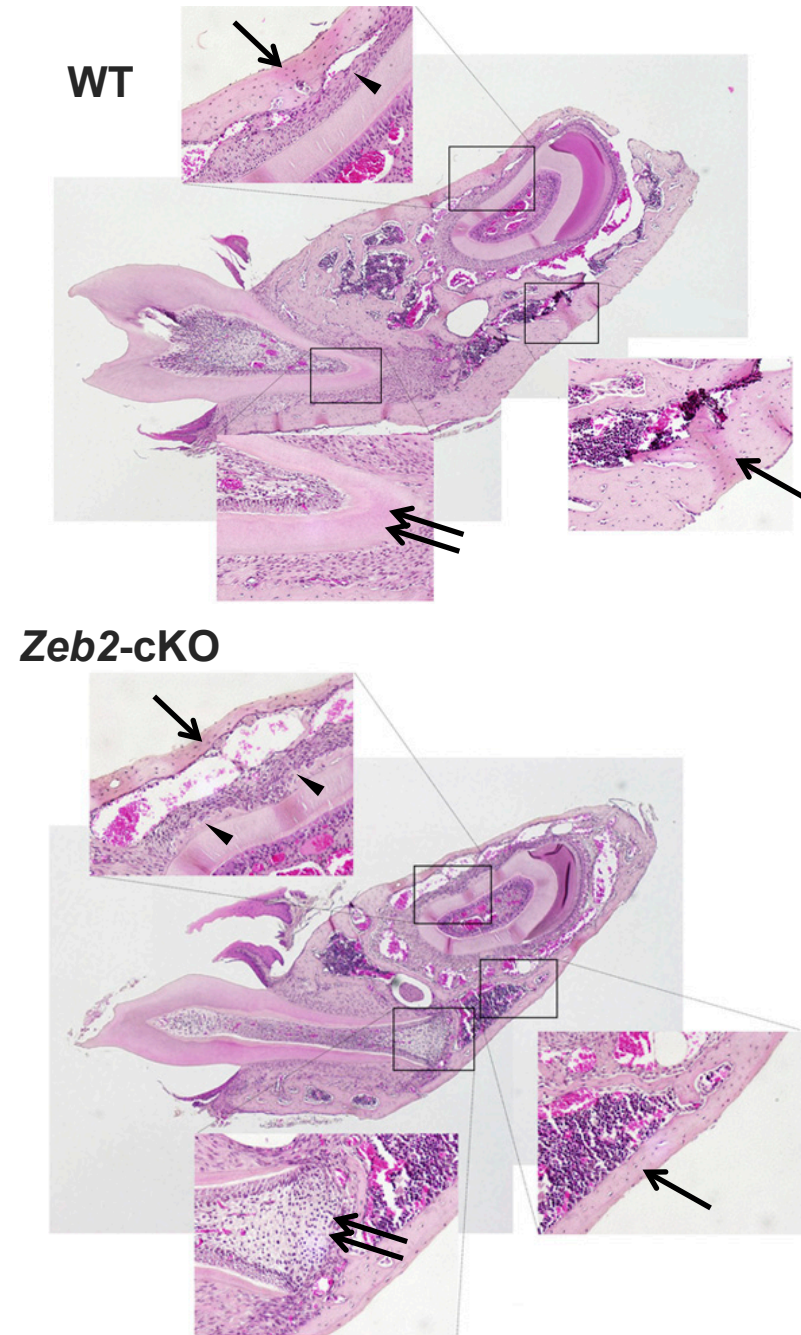

Supplementary Fig. 5

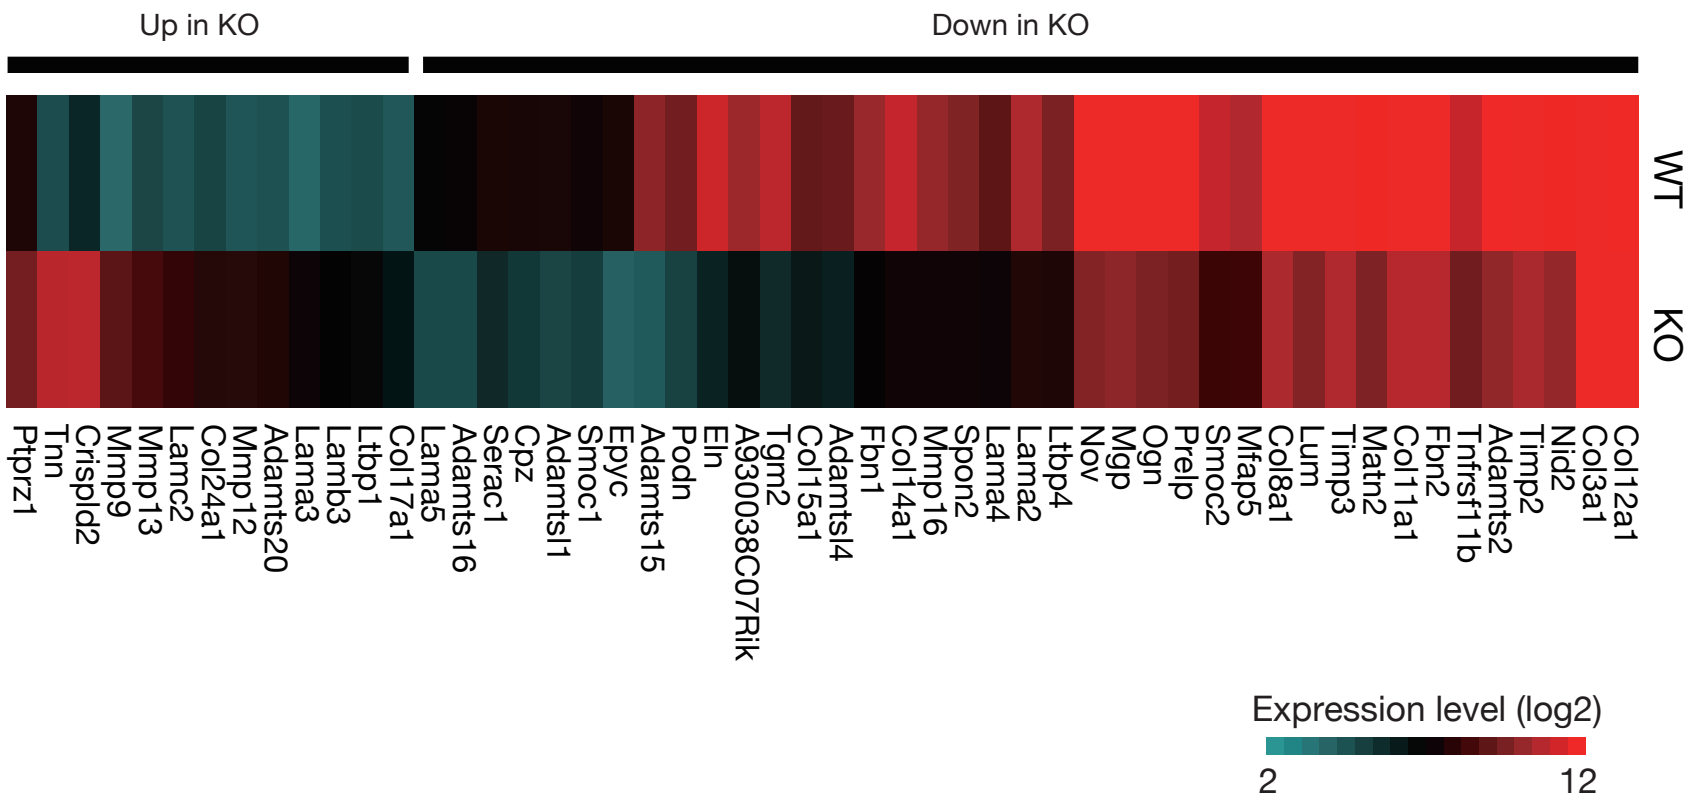

Supplementary Fig. 6



Supplementary Figure 1 Thinning of the dermis in MOWS patients detected by ultrasonography. (a) Comparison of the thickness of the dorsal skin between a MOWS patient (patient #11) and an age-matched healthy control in B-mode scan. Arrow, the dermis. Scale bar, 5 mm. (b) Mean thickness of the dermis in mm at the indicated skin sites. White bars, age-matched healthy controls (n = 6). Black and hatched bars, patients #11 and 12, respectively.

Supplementary Figure 2 (a) Real time RT-PCR analysis for *ZEB1* (upper) and *ZEB2* (bottom) gene expression in cultured dermal fibroblasts derived from a 12-year-old MOWS patient (# 11), who had a frameshift mutation (p.T761Kfs\_26), compared with fibroblasts derived from two healthy donors, a 16-year-old boy (16M) and a 17-year-old girl (17F). mRNA levels of *ZEB1* and *ZEB2* were normalized by hypoxanthine-guanine phosphoribosyltransferase (HPRT) mRNA. The primers used were as follows (sense and antisense, respectively); human *ZEB1*, 5'-GTGTACCAGAGGATGACCTGC-3' and 5'-TCCTCCCAGCAGTTCTTAGCA-3'; human *ZEB2*, 5'-CCCTGGCACAACAACGAGA-3' and 5'-GGTCTGGATCGTGGCTTCTG-3'; human HPRT; 5'-TGACCTTGATTTATTTGCATACC-3' and 5'-CGAGCAAGACGTTTCAGTCCT-3'. Arbitrary values of mRNAs are shown relative to the level in fibroblasts of the control (16M), which was set to 1. (b) Western blot analysis of *ZEB2* protein levels in cultured fibroblasts derived from the MOWS patient (#11) and healthy controls. (c) Densitometric analysis of the *ZEB2* protein. The relative amount of *ZEB2* protein in the blot shown in panel (b) was calculated by normalization with HPRT protein. Numbers represent densitometric values.

Supplementary Figure 3 (a) Targeting construct of the Cre-mediated *Zeb2* deletion (Higashi Y, *et al.* (2002) *Genesis* 32(2):82-84). (b) Mesenchymal-specific *Zeb2* deletion. D, dermal fibroblasts; E, epidermal cells; fat, subcutaneous fat tissues; liver, liver tissues; M, molecular markers. Epidermal, dermal cells and subcutaneous fat tissues were taken from the limbs.

Supplementary Figure 4 Miniaturized collagen fibrils in the dermis of *Zeb2*-cKO mice at 14 weeks of age. (a) Electron micrographs of the dermis of wild-type (WT, top) and

*Zeb2*-cKO mice (bottom). Scale bars, 500 nm, 100 nm (insets). (b) Diameters of collagen fibrils in WT (top) and *Zeb2*-cKO mice (bottom). Diameters of 500 fibrils were counted and are shown in 10 nm increments. \*\*\*,  $P < 0.001$  by Student's t-test.

Supplementary Figure 5 Abnormal craniofacial and teeth development in *Zeb2*-cKO mice. (a) A 3-week-old *Zeb2*-cKO mouse developed abnormal incisor teeth (arrow). (b) Sagittal images of craniofacial bones by soft X-ray (double-headed arrows) reveal a markedly shortened skull in the *Zeb2*-cKO mouse. (c) Histological views of teeth of wild-type (WT, upper images) and *Zeb2*-cKO (bottom images) mice stained with H&E. Boxed areas are reproduced at a higher magnification. Compared with the tooth of the WT mouse, the *Zeb2*-cKO mouse showed a reduction of alveolar bone volume (arrows), cellular cementum hyperplasia (arrowheads), and a morphological abnormality in the root apex (double arrows).

Supplementary Figure 6 DNA microarray analysis. Transcripts with at least a 4-fold difference in expression level between fibroblasts derived from *Zeb2*-cKO and from wild-type (WT) mice were selected and assorted with ECM-related genes.
